# Supplementary material for: Differential Sensing of Antibiotics Using Metal Ions and Gold Nanoclusters Based on TMB–H2O2 System
Source: MDPI journal article supplement (doi:10.3390/chemosensors10060222), 2022-06-12
Supplement: s1 [file s1]

# Differential Sensing of Antibiotics using Metal Ions and Gold

## Nanoclusters based on TMB-H<sub>2</sub>O<sub>2</sub> System

Suqin Liu<sup>1</sup>, Jinjie Wang<sup>1,2,\*</sup>, Yue Hu<sup>1</sup>, Yunjing Shi<sup>1</sup>, Jingxia Yang<sup>1</sup> and Min Zhang<sup>1,\*</sup>

1 College of Chemistry and Chemical Engineering, Shanghai University of Engineering Science, 333 Longteng Road, Shanghai 201620, China; m040119510@sues.edu.cn (S.L.); m340121235@sues.edu.cn (Y.H.); m040118166@sues.edu.cn (Y.S.); jxyang@sues.edu.cn (J.Y.)

2 Innovation Centre for Environment and Resources, Shanghai University of Engineering Science, 333 Longteng Road, Shanghai 201620, China

\* Correspondence: jinjiewang@sues.edu.cn (J.W.); Tel.: +86-21-67791221  
zhangmin@sues.edu.cn (M.Z.); Tel: +86-21-67791220

## The feasibility of Using a Multifunctional Microplate Reader

In this experiment, the model of the multifunctional microplate reader we used is INFINITE 200 PRO, which can select the way of multi-point detection of the solution in a single well, and select whether to wait for a certain time when detecting different samples. We have studied the above detection methods, and the results are shown in Table S1. Mode 1 was a standard single-point detection mode, mode 2 was a single-point detection and stayed for 60 s, mode 3 was a four-point detection mode (point spacing is 1800  $\mu\text{m}$ ), and mode 4 was a four-point detection and stayed for 60 s (point spacing is 1800  $\mu\text{m}$ ). The samples used for the study contained a small amount of protein ( $0.1 \text{ mg ml}^{-1}$ ), and each sample was tested in three replicates. As shown in Table S1, the average values obtained by different detection modes were very close. Compared with the relative standard deviation (RSD), the RSD value of mode 3 was more minor. Therefore, mode 3 was used in this study. In addition, we compared the results of the microplate reader with those of the UV-Vis spectrophotometer. The samples tested contained a small amount of protein ( $0.1 \text{ mg ml}^{-1}$ ). As shown in Figure S1, the experimental data detected by the microplate reader was very stable, and the absorbance intensity detected by the microplate was about 0.4 times as much as the data detected by the spectrophotometer.

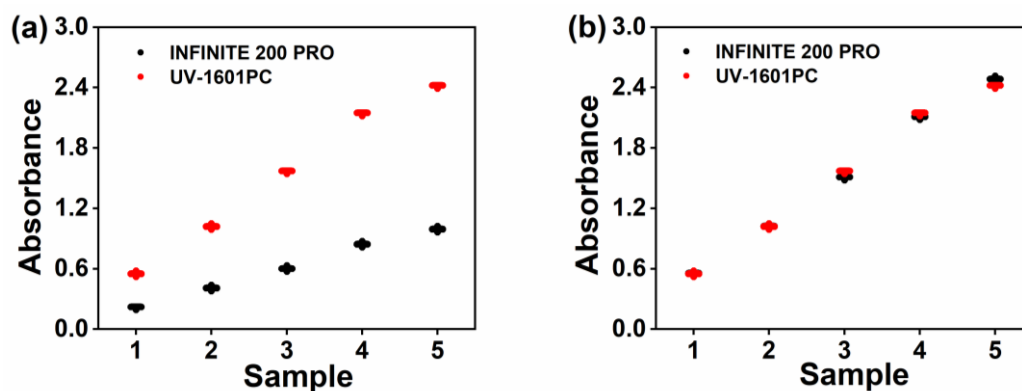

**Figure S1.** Comparison of multifunctional microplate reader and UV-Vis spectrophotometer. (a) Detection data obtained by a microplate reader (black dots) and a spectrophotometer (red dots). (b) The data obtained from the microplate reader were multiplied by a factor of 2.5.

**Table S1.** Comparison of detection modes of a multifunctional microplate reader.

| Detection mode | 1     | 2     | 3     | 4     |
|----------------|-------|-------|-------|-------|
| average value  | 1.017 | 0.987 | 0.994 | 0.984 |
| RSD            | 0.588 | 0.340 | 0.090 | 0.218 |

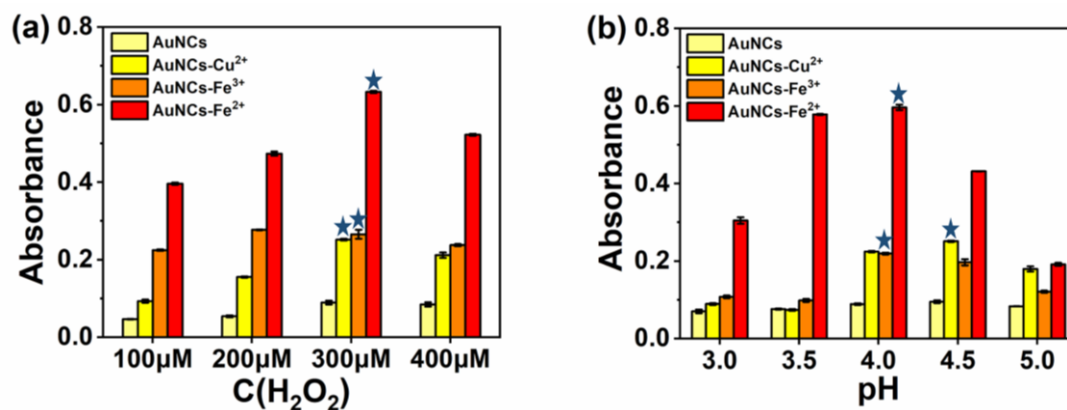**Figure S2.** Optimization of the reaction conditions (a) the concentration of  $H_2O_2$  and (b) the pH value of the reaction system (L- $H_2O_2$ ). The absorbance intensities of AuNCs ( $0.5 \text{ mg} \cdot \text{mL}^{-1}$ ) catalytic system before and after the addition of  $5 \text{ } \mu M$  metal ions ( $Cu^{2+}$ ,  $Fe^{3+}$ ,  $Fe^{2+}$ ).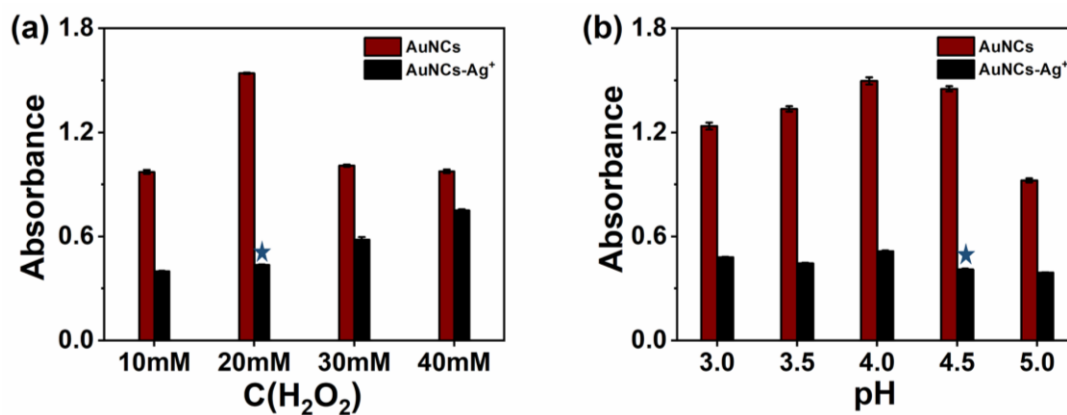**Figure S3.** Optimization of reaction conditions (a) the concentration of  $H_2O_2$  and (b) the pH value of the reaction system (H- $H_2O_2$ ). The absorbance intensities of AuNCs ( $0.5 \text{ mg} \cdot \text{mL}^{-1}$ ) catalytic system before and after the addition of  $10 \text{ } \mu M$   $Ag^+$  ions.

**Table S2.** Summary of the interaction between the antibiotic and metal ions reported in the literature.

| Metal Ions       | Antibiotics |     |     |     |     |    |
|------------------|-------------|-----|-----|-----|-----|----|
|                  | TC          | OTC | CTC | Cip | Van | GM |
| Cu <sup>2+</sup> | ○           | ○   | ○   | ○   |     |    |
| Fe <sup>3+</sup> | ○           | ○   | ○   | ○   | ○   |    |
| Fe <sup>2+</sup> | ○           | ○   | ○   | ○   |     |    |
| Ag <sup>+</sup>  |             |     |     |     |     | ○  |

### The results of the detection of different antibiotics

**Table S3.** LDA identification results of 6 antibiotics with different concentrations. The value in the table is  $I/I_0$ .

| Grouping variable | Independent variable               |                   |                   |                   |                                    |                  | Verified |
|-------------------|------------------------------------|-------------------|-------------------|-------------------|------------------------------------|------------------|----------|
|                   | AuNCs                              | AuNCs             | AuNCs             | AuNCs             | AuNCs                              | AuNCs            |          |
|                   | (L-H <sub>2</sub> O <sub>2</sub> ) | -Cu <sup>2+</sup> | -Fe <sup>3+</sup> | -Fe <sup>2+</sup> | (H-H <sub>2</sub> O <sub>2</sub> ) | -Ag <sup>+</sup> |          |
| TC (50 nM)        | 1.154                              | 0.881             | 2.194             | 1.453             | 0.963                              | 1.114            | TC       |
| TC (250 nM)       | 1.216                              | 0.681             | 2.725             | 1.575             | 0.952                              | 1.175            | TC       |
| TC (500 nM)       | 1.238                              | 0.466             | 3.066             | 1.637             | 0.972                              | 1.253            | TC       |
| TC (2500 nM)      | 1.293                              | 0.341             | 3.240             | 1.667             | 0.966                              | 1.253            | TC       |
| TC (5000 nM)      | 1.309                              | 0.227             | 3.302             | 1.675             | 0.999                              | 1.269            | TC       |
| OTC (50 nM)       | 1.184                              | 0.824             | 2.331             | 1.424             | 1.013                              | 1.122            | OTC      |
| OTC (250 nM)      | 1.352                              | 0.660             | 2.624             | 1.456             | 1.051                              | 1.234            | OTC      |
| OTC (500 nM)      | 1.524                              | 0.505             | 3.077             | 1.523             | 1.056                              | 1.399            | OTC      |
| OTC (2500 nM)     | 1.561                              | 0.383             | 3.385             | 1.569             | 1.080                              | 1.557            | OTC      |
| OTC (5000 nM)     | 1.621                              | 0.340             | 3.698             | 1.634             | 1.239                              | 1.617            | OTC      |
| CTC (50 nM)       | 1.185                              | 0.896             | 1.864             | 1.136             | 1.086                              | 1.233            | CTC      |
| CTC (250 nM)      | 1.380                              | 0.780             | 1.274             | 1.137             | 1.089                              | 1.247            | CTC      |
| CTC (500 nM)      | 1.413                              | 0.528             | 1.441             | 1.203             | 1.109                              | 1.263            | CTC      |
| CTC (2500 nM)     | 1.529                              | 0.357             | 1.457             | 1.242             | 1.132                              | 1.335            | CTC      |

|               |       |       |       |       |       |       |     |
|---------------|-------|-------|-------|-------|-------|-------|-----|
| CTC (5000 nM) | 1.646 | 0.232 | 1.536 | 1.301 | 1.389 | 1.376 | CTC |
| Cip (50 nM)   | 1.605 | 1.141 | 1.945 | 1.462 | 1.074 | 1.254 | Cip |
| Cip (250 nM)  | 2.020 | 1.151 | 2.491 | 1.705 | 1.098 | 1.321 | Cip |
| Cip (500 nM)  | 2.060 | 1.164 | 3.275 | 1.851 | 1.114 | 1.555 | Cip |
| Cip (2500 nM) | 2.199 | 1.244 | 4.572 | 1.987 | 1.188 | 1.661 | Cip |
| Cip (5000 nM) | 2.340 | 1.267 | 4.733 | 2.030 | 1.251 | 1.743 | Cip |
| Van (50 nM)   | 1.020 | 0.995 | 0.862 | 0.916 | 1.016 | 0.967 | Van |
| Van (250 nM)  | 1.022 | 1.000 | 0.835 | 0.911 | 1.015 | 0.973 | Van |
| Van (500 nM)  | 1.021 | 0.970 | 0.832 | 0.902 | 1.017 | 1.005 | Van |
| Van (2500 nM) | 0.958 | 1.019 | 0.829 | 0.889 | 1.024 | 1.015 | Van |
| Van (5000 nM) | 1.004 | 0.952 | 0.809 | 0.888 | 1.031 | 0.972 | Van |
| GM (50 nM)    | 0.831 | 0.871 | 0.370 | 0.706 | 1.004 | 1.313 | GM  |
| GM (250 nM)   | 0.829 | 0.860 | 0.353 | 0.704 | 0.996 | 1.316 | GM  |
| GM (500 nM)   | 0.804 | 0.817 | 0.340 | 0.679 | 1.004 | 1.462 | GM  |
| GM (2500 nM)  | 0.781 | 0.794 | 0.302 | 0.633 | 1.004 | 1.593 | GM  |
| GM (5000 nM)  | 0.729 | 0.745 | 0.316 | 0.629 | 1.001 | 1.711 | GM  |

---

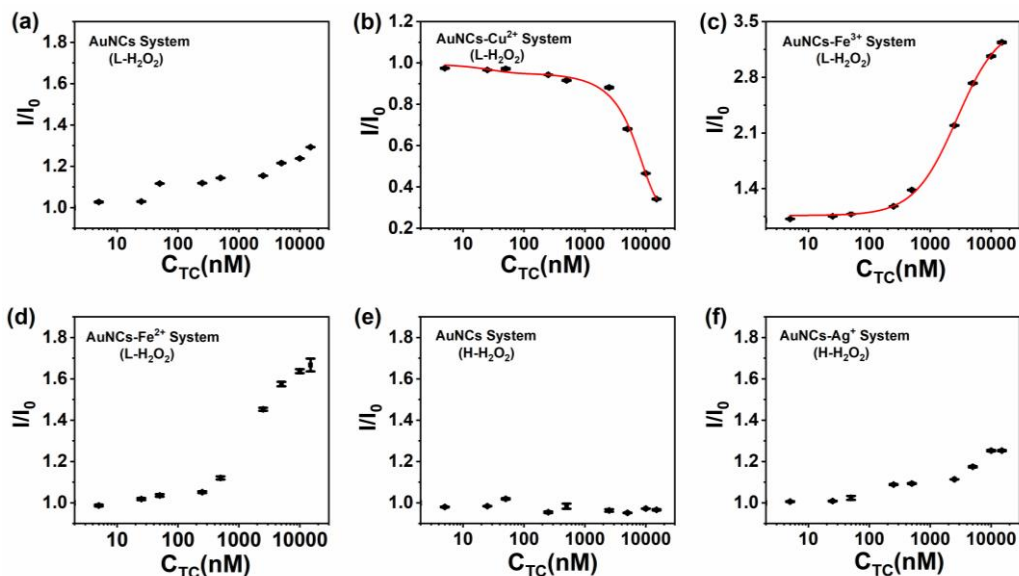

**Figure S4.** The dose-response curves for TC detection using (a) AuNCs, (b) AuNCs-Cu<sup>2+</sup>, (c) AuNCs-Fe<sup>3+</sup>, (d) AuNCs-Fe<sup>2+</sup>, (e) AuNCs, (f) AuNCs-Ag<sup>+</sup> reaction system, between the absorbance at 452 nm against the logarithmic concentration of TC. Reaction conditions: AuNCs, 0.5 mg · mL<sup>-1</sup>; Cu<sup>2+</sup>, 5 μM; Fe<sup>3+</sup>, 5 μM; Fe<sup>2+</sup>, 5 μM; Ag<sup>+</sup>, 10 μM; H<sub>2</sub>O<sub>2</sub>, 300 μM (a-d) or 20 mM (e, f); pH value, 4 (c-e) or 4.5 (a, b, f); TMB, 0.1 mg · mL<sup>-1</sup>. The error bars represent the standard deviation of the three measurements.

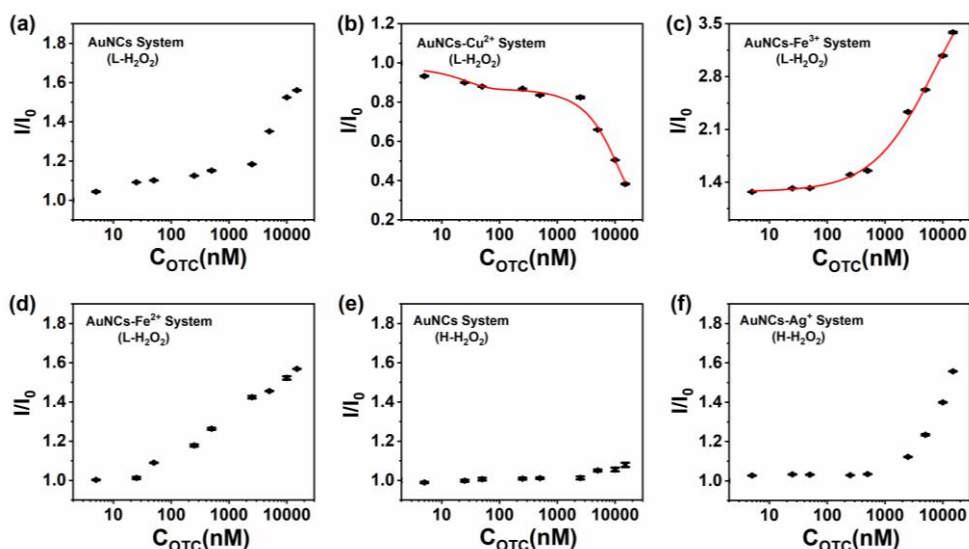

**Figure S5.** The dose-response curves for OTC detection using (a) AuNCs, (b) AuNCs-Cu<sup>2+</sup>, (c) AuNCs-Fe<sup>3+</sup>, (d) AuNCs-Fe<sup>2+</sup>, (e) AuNCs, (f) AuNCs-Ag<sup>+</sup> reaction system, between the absorbance at 452 nm against the logarithmic concentration of OTC. The reaction conditions were the same as those of TC.

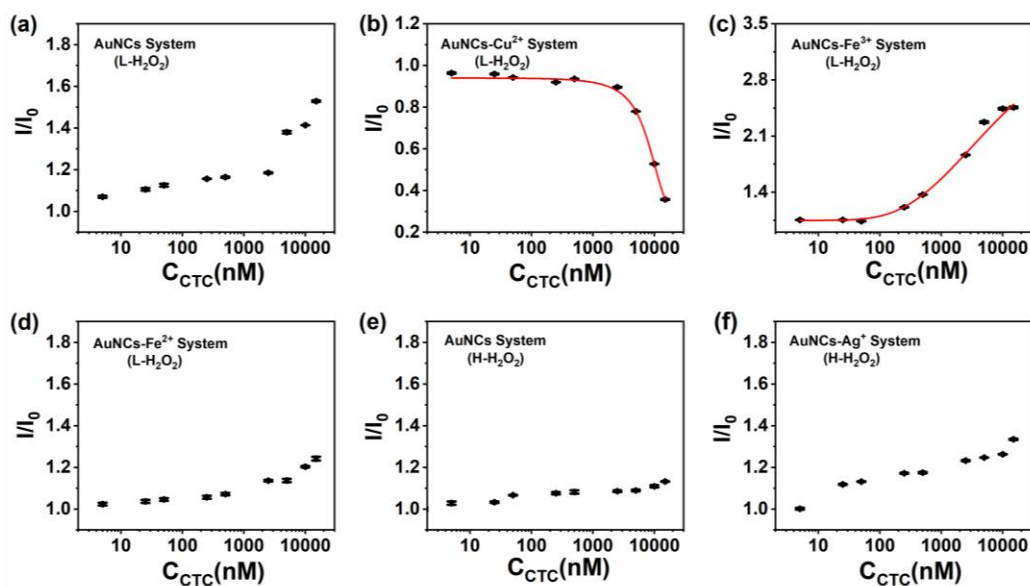

**Figure S6.** The dose-response curves for CTC detection using (a) AuNCs, (b) AuNCs-Cu<sup>2+</sup>, (c) AuNCs-Fe<sup>3+</sup>, (d) AuNCs-Fe<sup>2+</sup>, (e) AuNCs, (f) AuNCs-Ag<sup>+</sup> reaction system, between the absorbance at 452 nm against the logarithmic concentration of CTC. The reaction conditions were the same as those of TC.

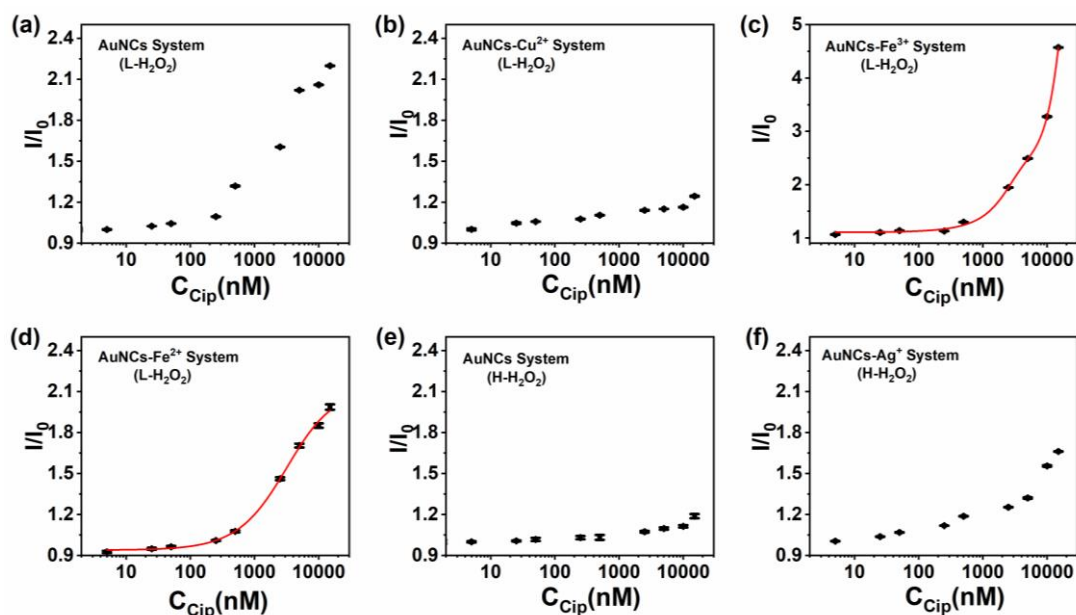

**Figure S7.** The dose-response curves for Cip detection using (a) AuNCs, (b) AuNCs-Cu<sup>2+</sup>, (c) AuNCs-Fe<sup>3+</sup>, (d) AuNCs-Fe<sup>2+</sup>, (e) AuNCs, (f) AuNCs-Ag<sup>+</sup> reaction system, between the absorbance at 452 nm against the logarithmic concentration of Cip. The reaction conditions were the same as those of TC.

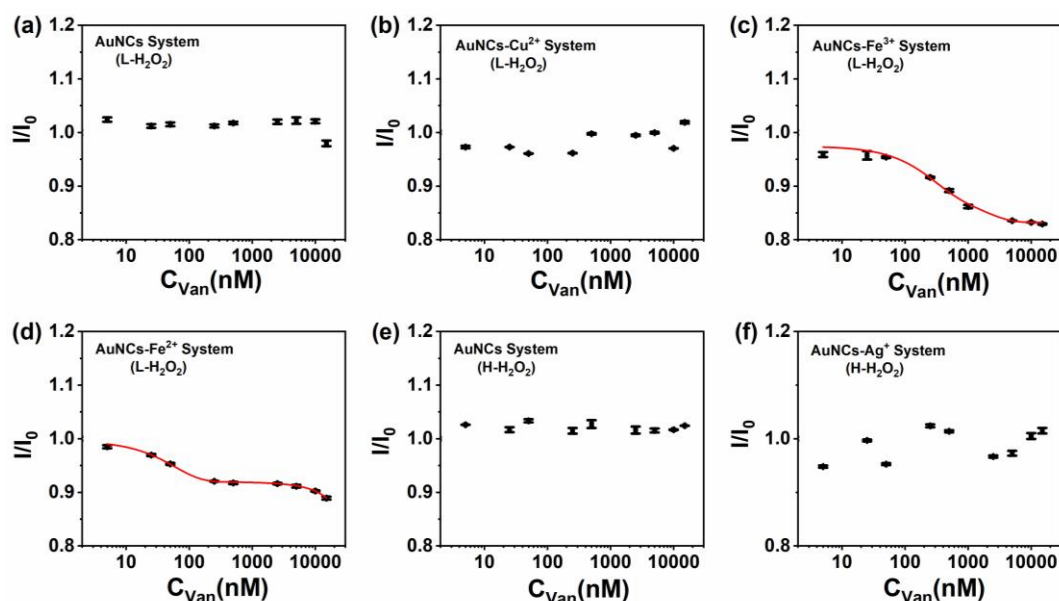

**Figure S8.** The dose-response curves for Van detection using (a) AuNCs, (b) AuNCs-Cu<sup>2+</sup>, (c) AuNCs-Fe<sup>3+</sup>, (d) AuNCs-Fe<sup>2+</sup>, (e) AuNCs, (f) AuNCs-Ag<sup>+</sup> reaction system, between the absorbance at 452 nm against the logarithmic concentration of Van. The reaction conditions were the same as those of TC.

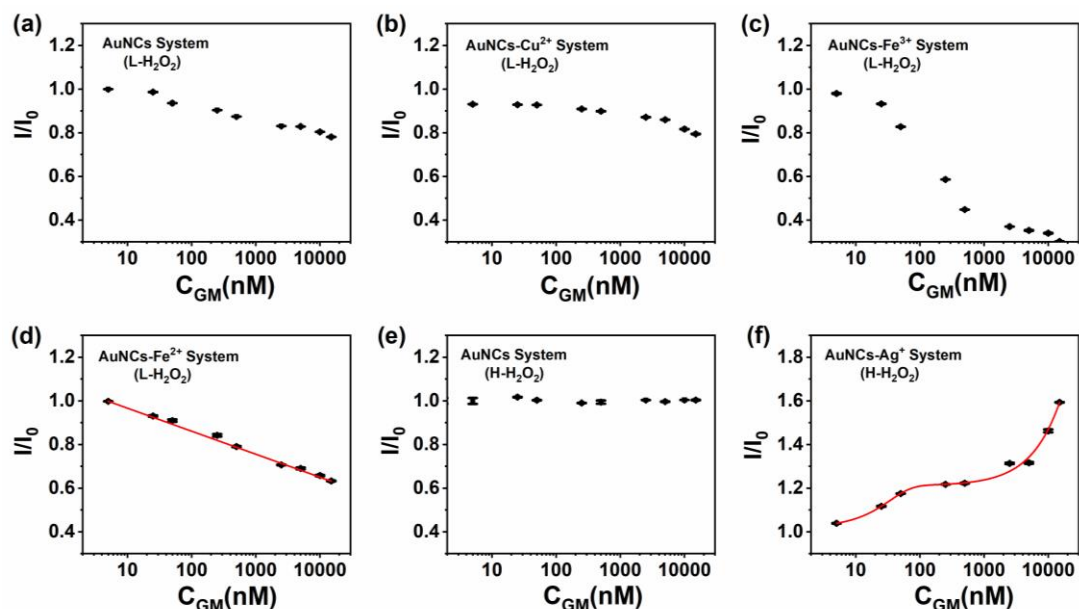

**Figure S9.** The dose-response curves for GM detection using (a) AuNCs, (b) AuNCs-Cu<sup>2+</sup>, (c) AuNCs-Fe<sup>3+</sup>, (d) AuNCs-Fe<sup>2+</sup>, (e) AuNCs, (f) AuNCs-Ag<sup>+</sup> reaction system, between the absorbance at 452 nm against the logarithmic concentration of GM. The reaction conditions were the same as those of TC.



**Table S4.** Summary of the fitting curve formula in Fig. S4-9.

| Figure    | Fitting formula                                                                                            | Parameter                                                                                                      | R <sup>2</sup> |
|-----------|------------------------------------------------------------------------------------------------------------|----------------------------------------------------------------------------------------------------------------|----------------|
| Figure S4 | (b) $y=A1+(A2-A1)\left[\frac{p}{1+10^{(\text{LOGx01-x})h1}}+\frac{1-p}{1+10^{(\text{LOGx02-x})h2}}\right]$ | A1 = 0.288 A2 = 1.260<br>LOGx01 = -12.130<br>p = 0.127<br>LOGx02 = 4882.946<br>h1 = -0.021 h2 = -1.137E-4      | 0.996          |
|           | (c) $y=\text{START}+(\text{END}-\text{START})\frac{x^n}{k^n+x^n}$                                          | START = 1.061<br>k = 2730.197 END = 3.489<br>n = 1.235                                                         | 0.996          |
| Figure S5 | (b) $y=A1+(A2-A1)\left[\frac{p}{1+10^{(\text{LOGx01-x})h1}}+\frac{1-p}{1+10^{(\text{LOGx02-x})h2}}\right]$ | A1 = 0.276 A2 = 1.576<br>LOGx01 = -14.245<br>p = 0.247<br>LOGx02 = 2627.965<br>h1 = -0.021 h2 = -7.034E-5      | 0.993          |
|           | (c) $y=\text{START}+(\text{END}-\text{START})\frac{x^n}{k^n+x^n}$                                          | START = 1.275<br>END = 4.507<br>K = 7234.212 n = 0.805                                                         | 0.992          |
| Figure S6 | (b) $y=A1+(A2-A1)\left[\frac{p}{1+10^{(\text{LOGx01-x})h1}}+\frac{1-p}{1+10^{(\text{LOGx02-x})h2}}\right]$ | A1 = 0.269 A2 = 1.024<br>LOGx01 = -1.921E8<br>LOGx02 = 7660.305<br>h1 = -2.704E-12<br>h2 = -1.262E-4 p = 0.036 | 0.990          |
|           | (c) $y=A_{\min}+\frac{A_{\max}-A_{\min}}{\left(1+\left(\frac{x_0}{x}\right)^h\right)^s}$                   | A <sub>min</sub> = 1.047 A <sub>max</sub> = 3.502<br>x <sub>0</sub> = 0.302 h = 0.403<br>s = 41.481            | 0.994          |
| Figure S7 | (c) $y=A1+(A2-A1)\left[\frac{p}{1+10^{(\text{LOGx01-x})h1}}+\frac{1-p}{1+10^{(\text{LOGx02-x})h2}}\right]$ | A1 = 0.610 A2 = 8.455<br>LOGx01 = 1484.531<br>LOGx02 = 17000.648<br>h1 = 4.193E-4 h2 = 8.335E-5<br>p = 0.168   | 0.996          |
|           | (d) $y=A1+(A2-A1)\left[\frac{p}{1+10^{(\text{LOGx01-x})h1}}+\frac{1-p}{1+10^{(\text{LOGx02-x})h2}}\right]$ | A1 = -5.397 A2 = 2.900<br>LOGx01 = -5363.434<br>LOGx02 = 15767.646<br>h1 = 1.543E-4 h2 = 0.001<br>p = 0.877    | 0.997          |
| Figure S8 | (c) $y=A1+(A2-A1)\left[\frac{p}{1+10^{(\text{LOGx01-x})h1}}+\frac{1-p}{1+10^{(\text{LOGx02-x})h2}}\right]$ | A1 = 0.832 A2 = 61.947<br>LOGx01 = -1678.077<br>LOGx02 = -9261.123<br>h1 = -0.002 h2 = -2.489E-4<br>p = 0.806  | 0.993          |

|           |     |                                                                                                        |                                                                                                             |       |
|-----------|-----|--------------------------------------------------------------------------------------------------------|-------------------------------------------------------------------------------------------------------------|-------|
| Figure S9 | (d) | $y=A1+(A2-A1)\left[\frac{p}{1+10^{(\text{LOGx01-x})h1}}+\frac{1-p}{1+10^{(\text{LOGx02-x})h2}}\right]$ | A1 = 0.607 A2 = 3.977<br>LOGx01 = -212.260<br>LOGx02 = 40113.907<br>h1 = -0.007 h2 = -2.991E-5<br>p = 0.901 | 0.993 |
|           | (f) | $y=A1+(A2-A1)\left[\frac{p}{1+10^{(\text{LOGx01-x})h1}}+\frac{1-p}{1+10^{(\text{LOGx02-x})h2}}\right]$ | A1 = -2.589 A2 = 3.269<br>LOGx01 = -2.655 p = 0.071<br>LOGx02 = -23961.641<br>h1 = 0.019 h2 = 9.033E-6      | 0.994 |

**Table S5.** Identification of unknown 18 antibiotics samples in river water.

| #  | Independent variable                        |                            |                            |                            |                                             |                           | Identity | Verified |
|----|---------------------------------------------|----------------------------|----------------------------|----------------------------|---------------------------------------------|---------------------------|----------|----------|
|    | AuNCs<br>(L-H <sub>2</sub> O <sub>2</sub> ) | AuNCs<br>-Cu <sup>2+</sup> | AuNCs<br>-Fe <sup>3+</sup> | AuNCs<br>-Fe <sup>2+</sup> | AuNCs<br>(H-H <sub>2</sub> O <sub>2</sub> ) | AuNCs<br>-Ag <sup>+</sup> |          |          |
| 1  | 1.228                                       | 0.561                      | 2.982                      | 1.612                      | 0.981                                       | 1.218                     | TC       | TC       |
| 2  | 1.483                                       | 0.644                      | 2.950                      | 1.491                      | 1.051                                       | 1.353                     | TC       | TC       |
| 3  | 1.396                                       | 0.631                      | 1.818                      | 1.189                      | 1.087                                       | 1.263                     | TC       | TC       |
| 4  | 2.075                                       | 1.154                      | 3.302                      | 1.832                      | 1.086                                       | 1.451                     | OTC      | OTC      |
| 5  | 1.022                                       | 1.007                      | 0.840                      | 0.893                      | 1.004                                       | 1.097                     | OTC      | OTC      |
| 6  | 0.811                                       | 0.845                      | 0.315                      | 0.677                      | 1.000                                       | 1.455                     | OTC      | OTC      |
| 7  | 1.225                                       | 0.605                      | 2.889                      | 1.606                      | 0.962                                       | 1.213                     | CTC      | CTC      |
| 8  | 1.423                                       | 0.591                      | 3.214                      | 1.484                      | 0.990                                       | 1.337                     | CTC      | CTC      |
| 9  | 1.394                                       | 0.599                      | 1.320                      | 1.168                      | 1.089                                       | 1.270                     | CTC      | CTC      |
| 10 | 2.073                                       | 1.171                      | 3.281                      | 1.859                      | 1.079                                       | 1.567                     | Cip      | Cip      |
| 11 | 1.008                                       | 1.001                      | 0.816                      | 0.893                      | 0.995                                       | 0.987                     | Cip      | Cip      |
| 12 | 0.832                                       | 0.875                      | 0.349                      | 0.697                      | 1.020                                       | 1.340                     | Cip      | Cip      |
| 13 | 1.194                                       | 0.840                      | 2.367                      | 1.509                      | 0.959                                       | 1.147                     | Van      | Van      |
| 14 | 1.192                                       | 0.849                      | 2.361                      | 1.422                      | 0.996                                       | 1.139                     | Van      | Van      |
| 15 | 1.218                                       | 0.899                      | 1.442                      | 1.107                      | 0.990                                       | 1.233                     | Van      | Van      |
| 16 | 2.176                                       | 1.216                      | 4.610                      | 1.986                      | 1.199                                       | 1.679                     | GM       | GM       |
| 17 | 0.983                                       | 1.022                      | 0.811                      | 0.880                      | 1.062                                       | 1.005                     | GM       | GM       |

**Table S6.** Recovery results for antibiotics detection in river water samples using AuNCs-metal ions system.

| Antibiotics | Systems                | Original (nM) | Spiked (nM) | Found (nM) | Recovery (%) | RSD (%) |
|-------------|------------------------|---------------|-------------|------------|--------------|---------|
| TC          | AuNCs-Cu <sup>2+</sup> | not detected  | 80          | 88.63      | 110.78       | 0.88    |
|             |                        | not detected  | 800         | 936.40     | 117.05       | 1.85    |
|             |                        | not detected  | 8000        | 7859.12    | 98.24        | 0.20    |
|             | AuNCs-Fe <sup>3+</sup> | not detected  | 80          | 77.07      | 96.33        | 1.63    |
|             |                        | not detected  | 800         | 799.68     | 99.96        | 0.27    |
|             |                        | not detected  | 8000        | 7531.90    | 94.15        | 0.58    |
| OTC         | AuNCs-Cu <sup>2+</sup> | not detected  | 80          | 72.13      | 90.16        | 0.58    |
|             |                        | not detected  | 800         | 732.51     | 91.56        | 0.64    |
|             |                        | not detected  | 8000        | 7250.88    | 90.64        | 0.41    |
|             | AuNCs-Fe <sup>3+</sup> | not detected  | 80          | 81.47      | 101.84       | 0.35    |
|             |                        | not detected  | 800         | 763.78     | 95.47        | 0.54    |
|             |                        | not detected  | 8000        | 8563.79    | 107.05       | 1.47    |
| CTC         | AuNCs-Cu <sup>2+</sup> | not detected  | 80          | 84.19      | 105.24       | 1.00    |
|             |                        | not detected  | 800         | 909.49     | 113.68       | 1.86    |
|             |                        | not detected  | 8000        | 8560.02    | 107.00       | 0.74    |
|             | AuNCs-Fe <sup>3+</sup> | not detected  | 80          | 84.96      | 106.20       | 1.11    |
|             |                        | not detected  | 800         | 809.05     | 101.13       | 0.49    |
|             |                        | not detected  | 80000       | 7616.94    | 95.21        | 0.21    |
| Cip         | AuNCs-Fe <sup>3+</sup> | not detected  | 80          | 82.19      | 102.74       | 1.42    |
|             |                        | not detected  | 800         | 808.52     | 101.07       | 0.74    |
|             |                        | not detected  | 8000        | 9142.66    | 114.28       | 0.89    |
|             | AuNCs-Fe <sup>2+</sup> | not detected  | 80          | 82.16      | 102.70       | 0.31    |
|             |                        | not detected  | 800         | 860.50     | 107.56       | 0.75    |
|             |                        | not detected  | 8000        | 8243.42    | 103.04       | 1.13    |

|     |                        |              |      |         |        |      |
|-----|------------------------|--------------|------|---------|--------|------|
| Van | AuNCs-Fe <sup>3+</sup> | not detected | 80   | 78.62   | 98.28  | 0.07 |
|     |                        | not detected | 800  | 843.00  | 105.37 | 0.55 |
|     |                        | not detected | 8000 | 7231.20 | 90.39  | 0.79 |
|     | AuNCs-Fe <sup>2+</sup> | not detected | 80   | 92.03   | 115.04 | 0.71 |
|     |                        | not detected | 800  | 852.00  | 106.50 | 1.41 |
|     |                        | not detected | 8000 | 8553.51 | 106.92 | 0.67 |
| GM  | AuNCs-Fe <sup>2+</sup> | not detected | 80   | 83.20   | 104.00 | 0.19 |
|     |                        | not detected | 800  | 738.59  | 92.32  | 0.31 |
|     |                        | not detected | 8000 | 8294.80 | 103.69 | 0.25 |
|     | AuNCs-Ag <sup>+</sup>  | not detected | 80   | 87.89   | 109.86 | 0.99 |
|     |                        | not detected | 800  | 755.38  | 94.42  | 1.13 |
|     |                        | not detected | 8000 | 7279.47 | 91.00  | 0.91 |

**Table S7.** LDA identification results of 11 mixture antibiotics and 6 antibiotics with different concentrations. The value in the table is I/I<sub>0</sub>.

| Grouping variable   | Independent variable               |                   |                   |                   |                                    |                  | Verified  |
|---------------------|------------------------------------|-------------------|-------------------|-------------------|------------------------------------|------------------|-----------|
|                     | AuNCs                              | AuNCs             | AuNCs             | AuNCs             | AuNCs                              | AuNCs            |           |
|                     | (L-H <sub>2</sub> O <sub>2</sub> ) | -Cu <sup>2+</sup> | -Fe <sup>3+</sup> | -Fe <sup>2+</sup> | (H-H <sub>2</sub> O <sub>2</sub> ) | -Ag <sup>+</sup> |           |
| TC + CTC (4000 nM)  | 1.699                              | 0.521             | 2.286             | 1.679             | 1.541                              | 1.305            | TC + CTC  |
| TC + CTC (1000 nM)  | 1.288                              | 0.643             | 2.028             | 1.533             | 1.474                              | 1.216            | TC + CTC  |
| TC + CTC (200 nM)   | 1.170                              | 0.827             | 1.978             | 1.272             | 1.309                              | 1.034            | TC + CTC  |
| TC + CM (4000 nM)   | 1.204                              | 0.702             | 1.995             | 1.396             | 1.911                              | 1.246            | TC + CM   |
| TC + CM (1000 nM)   | 1.161                              | 0.747             | 1.837             | 1.347             | 1.846                              | 1.130            | TC + CM   |
| TC + CM (200 nM)    | 1.032                              | 0.922             | 1.530             | 1.282             | 1.222                              | 1.063            | TC + CM   |
| OTC + CTC (4000 nM) | 2.284                              | 0.425             | 2.339             | 1.628             | 1.074                              | 1.182            | OTC + CTC |
| OTC + CTC (1000 nM) | 2.039                              | 0.698             | 2.250             | 1.530             | 1.092                              | 1.128            | OTC + CTC |
| OTC + CTC (200 nM)  | 1.951                              | 0.785             | 1.902             | 1.404             | 1.087                              | 0.998            | OTC + CTC |
| OTC + Cip (4000 nM) | 2.518                              | 1.237             | 3.513             | 2.280             | 1.375                              | 2.300            | OTC + Cip |
| OTC + Cip (1000 nM) | 2.287                              | 1.200             | 3.412             | 2.179             | 1.348                              | 1.514            | OTC + Cip |

|                           |       |       |       |       |       |       |                 |
|---------------------------|-------|-------|-------|-------|-------|-------|-----------------|
| OTC + Cip (200 nM)        | 2.179 | 1.158 | 2.533 | 1.496 | 1.194 | 1.212 | OTC + Cip       |
| OTC + GM (4000 nM)        | 1.439 | 0.516 | 2.115 | 1.421 | 1.164 | 1.759 | OTC + GM        |
| OTC + GM (1000 nM)        | 1.228 | 0.679 | 1.868 | 1.387 | 1.187 | 1.688 | OTC + GM        |
| OTC + GM (200 nM)         | 1.138 | 0.821 | 1.572 | 1.332 | 1.181 | 1.114 | OTC + GM        |
| CTC + Van (4000 nM)       | 1.705 | 0.667 | 2.090 | 1.350 | 1.049 | 1.361 | CTC + Van       |
| CTC + Van (1000 nM)       | 1.689 | 0.671 | 2.039 | 1.347 | 1.050 | 1.314 | CTC + Van       |
| CTC + Van (200 nM)        | 1.590 | 0.844 | 1.936 | 1.317 | 1.094 | 1.255 | CTC + Van       |
| Cip + Van (4000 nM)       | 2.582 | 1.267 | 2.496 | 2.176 | 1.574 | 2.089 | Cip + Van       |
| Cip + Van (1000 nM)       | 2.278 | 1.296 | 2.387 | 2.141 | 1.298 | 1.644 | Cip + Van       |
| Cip + Van (200 nM)        | 1.999 | 1.289 | 1.956 | 1.589 | 1.178 | 1.503 | Cip + Van       |
| Van + GM (4000 nM)        | 0.498 | 0.702 | 0.401 | 0.630 | 1.383 | 1.591 | Van + GM        |
| Van + GM (1000 nM)        | 0.593 | 0.758 | 0.506 | 0.677 | 1.242 | 1.161 | Van + GM        |
| Van + GM (200 nM)         | 0.614 | 0.776 | 0.593 | 0.687 | 1.076 | 1.149 | Van + GM        |
| TC + OTC + CTC (4000 nM)  | 1.753 | 0.319 | 2.420 | 1.756 | 1.040 | 1.334 | TC + OTC + CTC  |
| TC + OTC + CTC (1000 nM)  | 1.689 | 0.343 | 2.389 | 1.736 | 1.035 | 1.067 | TC + OTC + CTC  |
| TC + OTC + CTC (200 nM)   | 1.623 | 0.633 | 1.488 | 1.203 | 1.086 | 1.059 | TC + OTC + CTC  |
| TC + Van + GM (4000 nM)   | 1.441 | 0.703 | 1.600 | 1.361 | 1.242 | 1.241 | TC + Van + GM   |
| TC + Van + GM (1000 nM)   | 1.398 | 0.843 | 1.591 | 1.239 | 1.214 | 1.213 | TC + Van + GM   |
| TC + Van + GM (200 nM)    | 1.237 | 0.854 | 1.525 | 1.137 | 1.098 | 1.080 | TC + Van + GM   |
| Six antibiotics (4000 nM) | 1.637 | 0.387 | 3.579 | 1.550 | 2.209 | 2.989 | Six antibiotics |
| Six antibiotics (1000 nM) | 1.503 | 0.486 | 3.473 | 1.526 | 2.006 | 1.704 | Six antibiotics |
| Six antibiotics (200 nM)  | 1.315 | 0.657 | 2.521 | 1.304 | 1.430 | 1.299 | Six antibiotics |
| TC (500 nM)               | 1.238 | 0.466 | 3.066 | 1.637 | 0.972 | 1.253 | TC              |
| TC (2500 nM)              | 1.293 | 0.341 | 3.240 | 1.667 | 0.966 | 1.253 | TC              |
| TC (5000 nM)              | 1.309 | 0.227 | 3.302 | 1.675 | 0.999 | 1.269 | TC              |
| OTC (500 nM)              | 1.524 | 0.505 | 3.077 | 1.523 | 1.056 | 1.399 | OTC             |
| OTC (2500 nM)             | 1.561 | 0.383 | 3.385 | 1.569 | 1.080 | 1.557 | OTC             |
| OTC (5000 nM)             | 1.621 | 0.340 | 3.698 | 1.634 | 1.239 | 1.617 | OTC             |
| CTC (500 nM)              | 1.413 | 0.528 | 2.441 | 1.203 | 1.186 | 1.263 | CTC             |

|               |       |       |       |       |       |       |     |
|---------------|-------|-------|-------|-------|-------|-------|-----|
| CTC (2500 nM) | 1.529 | 0.357 | 2.457 | 1.242 | 1.211 | 1.335 | CTC |
| CTC (5000 nM) | 1.646 | 0.232 | 2.536 | 1.301 | 1.486 | 1.376 | CTC |
| Cip (500 nM)  | 2.060 | 1.164 | 3.275 | 1.851 | 1.114 | 1.555 | Cip |
| Cip (2500 nM) | 2.199 | 1.244 | 4.572 | 1.987 | 1.188 | 1.661 | Cip |
| Cip (5000 nM) | 2.340 | 1.267 | 4.733 | 2.030 | 1.251 | 1.743 | Cip |
| Van (500 nM)  | 1.021 | 0.970 | 0.832 | 0.902 | 1.017 | 1.005 | Van |
| Van (2500 nM) | 0.958 | 1.019 | 0.829 | 0.889 | 1.024 | 1.015 | Van |
| Van (5000 nM) | 1.004 | 0.952 | 0.809 | 0.888 | 1.031 | 0.972 | Van |
| GM (500 nM)   | 0.804 | 0.817 | 0.340 | 0.679 | 1.004 | 1.462 | GM  |
| GM (2500 nM)  | 0.781 | 0.794 | 0.302 | 0.633 | 1.003 | 1.593 | GM  |
| GM (5000 nM)  | 0.729 | 0.745 | 0.316 | 0.629 | 1.001 | 1.711 | GM  |

**Table S8.** Identification of unknown 11 mixture antibiotics samples in river water.

| #  | Independent variable                        |                            |                            |                            |                                             |                           | Identity        | Verified        |
|----|---------------------------------------------|----------------------------|----------------------------|----------------------------|---------------------------------------------|---------------------------|-----------------|-----------------|
|    | AuNCs<br>(L-H <sub>2</sub> O <sub>2</sub> ) | AuNCs-<br>Cu <sup>2+</sup> | AuNCs-<br>Fe <sup>3+</sup> | AuNCs-<br>Fe <sup>2+</sup> | AuNCs<br>(H-H <sub>2</sub> O <sub>2</sub> ) | AuNCs-<br>Ag <sup>+</sup> |                 |                 |
| 1  | 1.619                                       | 0.643                      | 2.128                      | 1.533                      | 1.474                                       | 1.216                     | TC + CTC        | TC + CTC        |
| 2  | 1.171                                       | 0.757                      | 1.837                      | 1.347                      | 1.846                                       | 1.130                     | TC + CM         | TC + CM         |
| 3  | 2.039                                       | 0.698                      | 2.550                      | 1.530                      | 0.924                                       | 1.128                     | OTC + CTC       | OTC + CTC       |
| 4  | 2.287                                       | 1.171                      | 3.412                      | 2.179                      | 1.348                                       | 1.514                     | OTC + Cip       | OTC + Cip       |
| 5  | 1.228                                       | 0.679                      | 1.868                      | 1.406                      | 1.187                                       | 1.688                     | OTC + GM        | OTC + GM        |
| 6  | 1.689                                       | 0.671                      | 2.039                      | 1.369                      | 1.050                                       | 1.337                     | CTC + Van       | CTC + Van       |
| 7  | 2.328                                       | 1.296                      | 2.387                      | 2.141                      | 1.298                                       | 1.664                     | Cip + Van       | Cip + Van       |
| 8  | 0.593                                       | 0.758                      | 0.506                      | 0.707                      | 1.242                                       | 1.161                     | Van + GM        | Van + GM        |
| 9  | 1.689                                       | 0.524                      | 1.945                      | 1.736                      | 1.035                                       | 1.067                     | TC + OTC + CTC  | TC + OTC + CTC  |
| 10 | 1.411                                       | 0.784                      | 1.591                      | 1.324                      | 1.284                                       | 1.269                     | TC + Van + GM   | TC + Van + GM   |
| 11 | 1.529                                       | 0.486                      | 3.473                      | 1.526                      | 2.006                                       | 2.704                     | Six antibiotics | Six antibiotics |
